# Supplementary material for: DNA Methylation Analysis Identifies Novel Epigenetic Loci in Dilated Murine Heart upon Exposure to Volume Overload
Source: MDPI journal article supplement (doi:10.3390/ijms24065885), 2023-03-20
Supplement: s1 [file s1]

**Supplementary Figure S1.** MeDIP-qPCR primer establishment. Corresponding amplification curves are shown, which were generated by using serial dilution of DNA from 1:10 to 1,000,000.

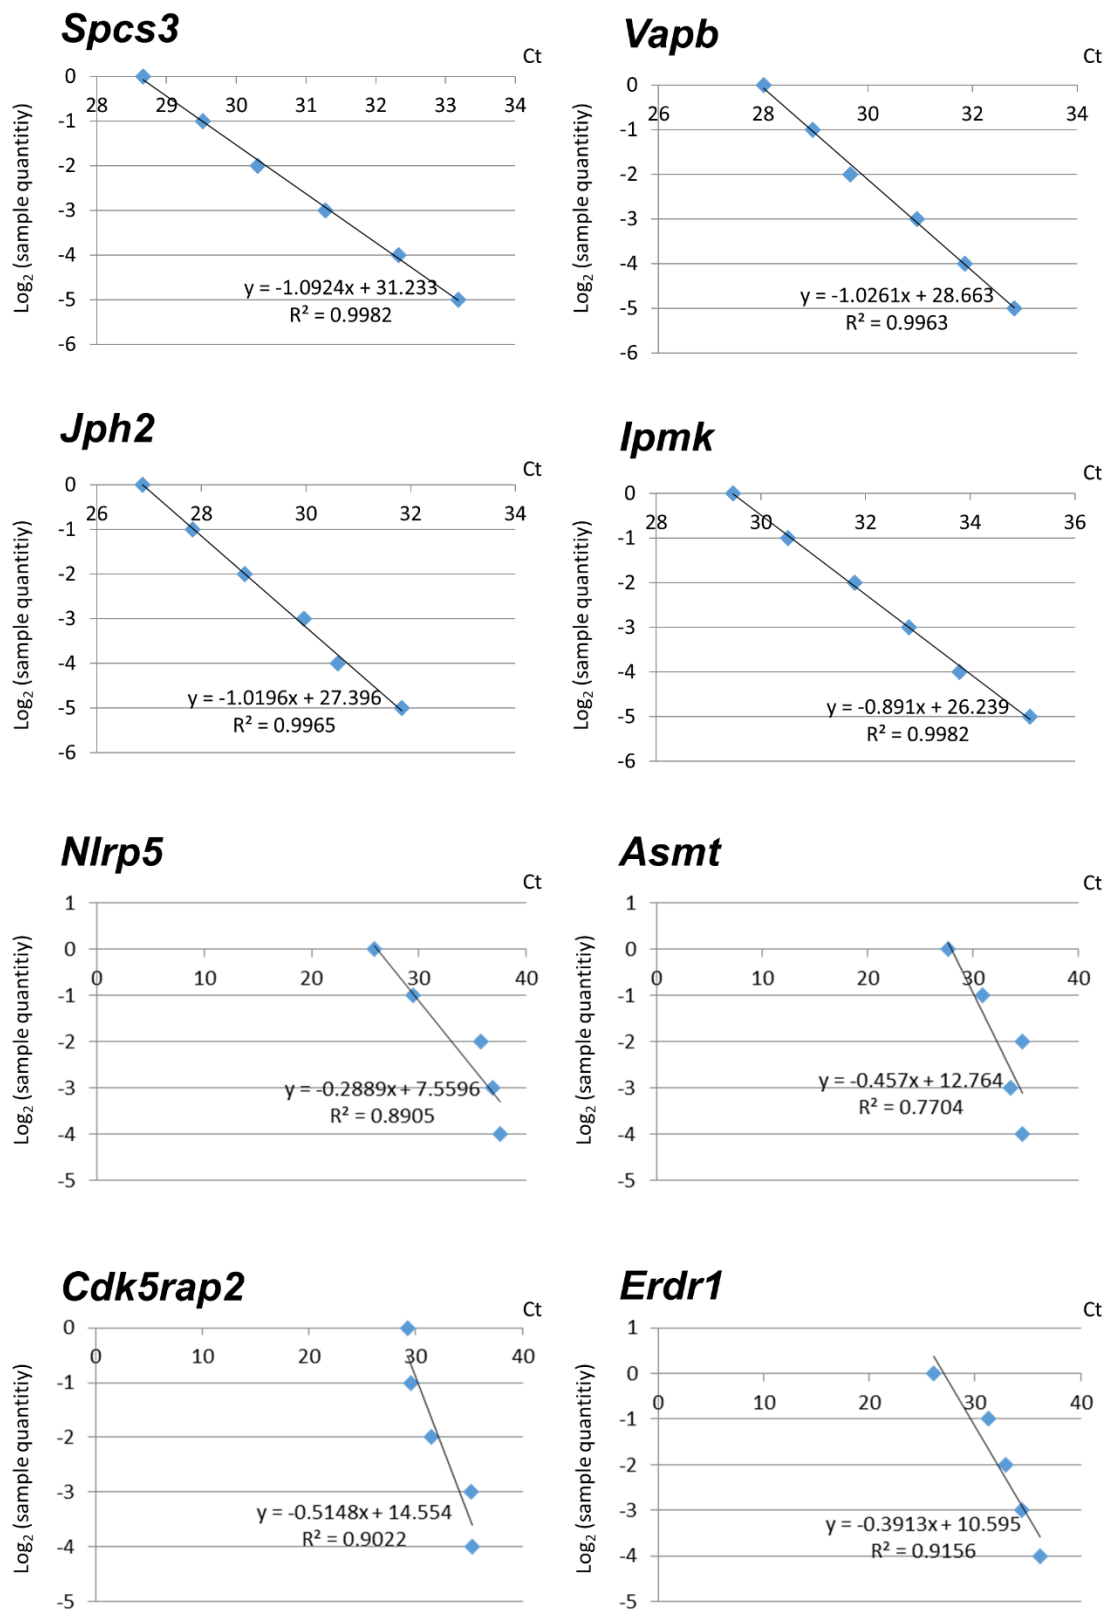

**Supplementary Table S1.** Echocardiographic measurements of sham and shunt mice at 16 weeks after operation

|              | Sham (9 mice) | Shunt (8 mice)   |
|--------------|---------------|------------------|
| HR (bpm)     | 434 ± 7.09    | 471 ± 11.48      |
| LVESD (mm)   | 3.559 ± 0.09  | 5.39 ± 0.29**    |
| LVEDD (mm)   | 4.67 ± 0.06   | 6.36 ± 0.20***   |
| Vol s (μl)   | 53.10 ± 3.27  | 143.69 ± 17.13** |
| Vol d (μl)   | 101.04 ± 2.87 | 206.92 ± 14.40** |
| SV (μl)      | 47.94 ± 3.76  | 63.24 ± 9.03     |
| LVAWT (mm)   | 0.58 ± 0.05   | 0.75 ± 0.04*     |
| LVPWT (mm)   | 0.602 ± 0.03  | 0.75 ± 0.04*     |
| FS (%)       | 23.83 ± 2.00  | 15.41 ± 2.51*    |
| EF %         | 47.40 ± 3.26  | 31.45 ± 4.83*    |
| RWT          | 0.25 ± 0.016  | 0.24 ± 0.01      |
| LV Mass (mg) | 112.31 ± 8.68 | 232.32 ± 20.69** |

HR, heart rate; LVAWT, left ventricular anterior wall thickness; LVEDD, LV end-diastolic dimension; LVESD, LV end-systolic dimension; LVM, left ventricle mass; LVPWT, left ventricular posterior wall thickness; EF, ejection fraction; FS, fractional shortening; RWT, relative wall thickness (LVAWT+LVPWT/ LVEDD). Vol d, left ventricle volume at diastole; Vol s, left ventricle volume at systole; SV, left ventricle stroke volume; Data are expressed as mean ± SEM. \* $P < 0.05$ ; \*\* $P < 0.01$ ; \*\*\* $P < 0.001$  vs. sham.

Supplementary Table S2. CpG methylation patterns in sham and shunt hearts at 16 weeks after OP

| File                  | Total Reads | Aligned Reads | Unaligned Reads | Ambiguously Aligned Reads | No Genomic Sequence | Total Cs  | Methylated CpGs | Unmethylated CpGs | Methylated CpGs | Unmethylated CpGs | Methylated CHGs | Unmethylated CHGs | CpG(%) | CHG(%) | CHH(%) | Mean   | SD          |
|-----------------------|-------------|---------------|-----------------|---------------------------|---------------------|-----------|-----------------|-------------------|-----------------|-------------------|-----------------|-------------------|--------|--------|--------|--------|-------------|
| Sham1_bismark_report  | 18166274    | 13612188      | 1598667         | 2955419                   | 0                   | 134941403 | 3750603         | 2167425           | 411611          | 28503974          | 1257642         | 98850148          | 63.60% | 1.75%  | 1.50%  | 64.92% | 0.031860372 |
| Sham2_bismark_report  | 30663247    | 22344104      | 3248396         | 5070747                   | 0                   | 222523571 | 6320799         | 2976072           | 519533          | 47429133          | 1634809         | 163643225         | 68.55% | 1.70%  | 1.50%  |        |             |
| Sham3_bismark_report  | 23849904    | 17600703      | 2279118         | 3961083                   | 0                   | 173700677 | 4766921         | 2918493           | 453707          | 36604176          | 1431534         | 127505846         | 62.60% | 1.75%  | 1.50%  |        |             |
| Shunt1_bismark_report | 21551320    | 16183061      | 1930367         | 3437892                   | 0                   | 160929710 | 4410031         | 2593680           | 470894          | 33998293          | 1420947         | 118035865         | 63.25% | 1.65%  | 1.40%  | 66.15% | 0.01758124  |
| Shunt2_bismark_report | 42890670    | 30424652      | 4603783         | 7862235                   | 0                   | 299418789 | 8255218         | 4305443           | 677092          | 62609997          | 2175707         | 221395332         | 66.25% | 1.65%  | 1.40%  |        |             |
| Shunt3_bismark_report | 11977047    | 6155005       | 4342905         | 1479137                   | 0                   | 61449315  | 1633857         | 873647            | 63594           | 12886238          | 240549          | 45749440          | 65.25% | 0.50%  | 0.55%  |        |             |
| Shunt4_bismark_report | 61311052    | 45414266      | 5534222         | 10362564                  | 0                   | 452468263 | 12712154        | 6246966           | 1056062         | 96006816          | 3311685         | 333134580         | 67.55% | 1.70%  | 1.45%  |        |             |
| Shunt5_bismark_report | 6386020     | 3855443       | 1688293         | 842284                    | 0                   | 38650919  | 1077208         | 501783            | 38497           | 8280445           | 143916          | 28609070          | 68.20% | 0.50%  | 0.50%  |        |             |
| Shunt6_bismark_report | 26241971    | 19517293      | 2262616         | 4462062                   | 0                   | 193054291 | 5385583         | 2776128           | 501453          | 40846615          | 1558933         | 141985579         | 66.40% | 1.75%  | 1.50%  |        |             |

**Supplementary Table S3.** Primer sequences used for MeDIP-qPCR and the coordinates for the amplified regions

| Region                        | Sequences                                                | Amplicon size (bp) |
|-------------------------------|----------------------------------------------------------|--------------------|
| <i>Spcs3</i><br>(+135 - +220) | 5'-GCTTTCAGTGAATCCGCCAA-3'<br>5'-AGTGGAGGAGGCGGGTCT-3'   | 85                 |
| <i>Vapb</i><br>(-126 - -12)   | 5'-CCTCCCAAGCCTCGAGAG-3'<br>5'-CAAAAGGGAGACTGCGCATG-3'   | 114                |
| <i>Jph2</i><br>(-133 - -50)   | 5'-GAAAAGGAAGCCGACCGAAG-3'<br>5'-AAGGAGAGCACACCAGACTC-3' | 83                 |
| <i>lpmk</i><br>(-277 - -196)  | 5'-GACTCTAGACCCGCTCAGTT-3'<br>5'-CTACCGGACCAGACCTGC-3'   | 81                 |

**Supplementary Table S4.** Primer sequences used for bisulfite-sequencing analysis and the coordinates for the amplified regions

| Primer                            | Sequences                                                                  |
|-----------------------------------|----------------------------------------------------------------------------|
| m <i>Spc3</i> _BS<br>(+81- +241)  | 5'-TTATATTTTTTTGGGTTTTATTTATTGGG-3'<br>5'-AAAACCATAAAACAACCTAAACAATAAAA-3' |
| m <i>Vapb</i> _BS<br>(-160- -28)  | 5'-GTTTATTGAATAGTTTTATTGGAGAT-3'<br>5'-CATACRCAAAATATTCAAAACCAC-3'         |
| m <i>Jph2</i> _BS<br>(-151- -28)  | 5'-TTAATAAGGTAGTAATTTGAAAAGGA-3'<br>5'-AACTCCTTTCRTTACTTTTCTTAAAAAA-3'     |
| m <i>lpmk</i> _BS<br>(-351- -138) | 5'-TAAGTAGGGGTATTTGAGATAAGTTTTTA-3'<br>5'-ATACCCAAAAACTACCCTACTAAAT-3'     |

**Supplementary Table S5.** Primer sequences used for mRNA expression analysis by real-time qPCR

| Transcript    | Sequences                                                    |
|---------------|--------------------------------------------------------------|
| <i>Dnmt1</i>  | 5'-GCCATCTCTTTCCAAGTCTTT-3'<br>5'-TGTTCTGTCGTCTGCAACCT-3'    |
| <i>Dnmt3a</i> | 5'-GCTTTCTTCTCAGCCTCCCT-3'<br>5'-CCATGCCAAGACTCACCTTC-3'     |
| <i>Dnmt3b</i> | 5'-ATCCATAGTGCCTTGGGACC-3'<br>5'-CTGGCACCCCTCTTCTTCATT-3'    |
| <i>Tet1</i>   | 5'-GGGAGCTCATGGAGACTAGG-3'<br>5'-AGAGCTCTTCCCTTCCTTCC-3'     |
| <i>Tet2</i>   | 5'-CTTCTCTGCTCATTCCCACA-3'<br>5'-AGCTCCGACTTCTCGATTGT-3'     |
| <i>Tet3</i>   | 5'-CAGCGATTGTCTTCCTTGGT-3'<br>5'-GCCTGCATGGACTTCTGTG-3'      |
| <i>Spcs3</i>  | 5'-CGTCTCGCGGATCATGCTAAA-3'<br>5'-AGC TTCGGATTATCACCTCTCA-3' |
| <i>Jph2</i>   | 5'-AACGACATGGGCTTGGCATA-3'<br>5'-GATAGGTTCCCTCCGTCTGCG-3'    |
| <i>Vapb</i>   | 5'-GGGCCTCTCTCAATGTGTCT-3'<br>5'-CCTCCTTCCATACTGCCTCC-3'     |
| <i>Ipmk</i>   | 5'-GATGGAGGAGATCGGGTTCC-3'<br>5'-GTGCTGGTTTTGTGTCTCGT-3'     |
| <i>Nppa</i>   | 5'-GGGGGTAGGATTGACAGGAT-3'<br>5'-CAGAATCGACTGCCTTTTCC-3'     |
| <i>Nppb</i>   | 5'-ACAAGATAGACCGGATCGGA-3'<br>5'-ACCCAGGCAGAGTCAGAAAC-3'     |
| <i>Gapdh</i>  | 5'-GAGACGGCCGCATCTTCTT-3'<br>5'-CAATCTCCACTTTGC CACTGC-3'    |
